# Supplementary material for: Acquired resistance to oxaliplatin is not directly associated with increased resistance to DNA damage in SK-N-ASrOXALI4000, a newly established oxaliplatin-resistant sub-line of the neuroblastoma cell line SK-N-AS
Source: PubMed Central journal article supplement (PMC5305101; doi:10.1371/journal.pone.0172140), 2017-02-13
Supplement: pone.0172140.s001.pdf [file pone.0172140.s001.pdf]

S1 Figure

A

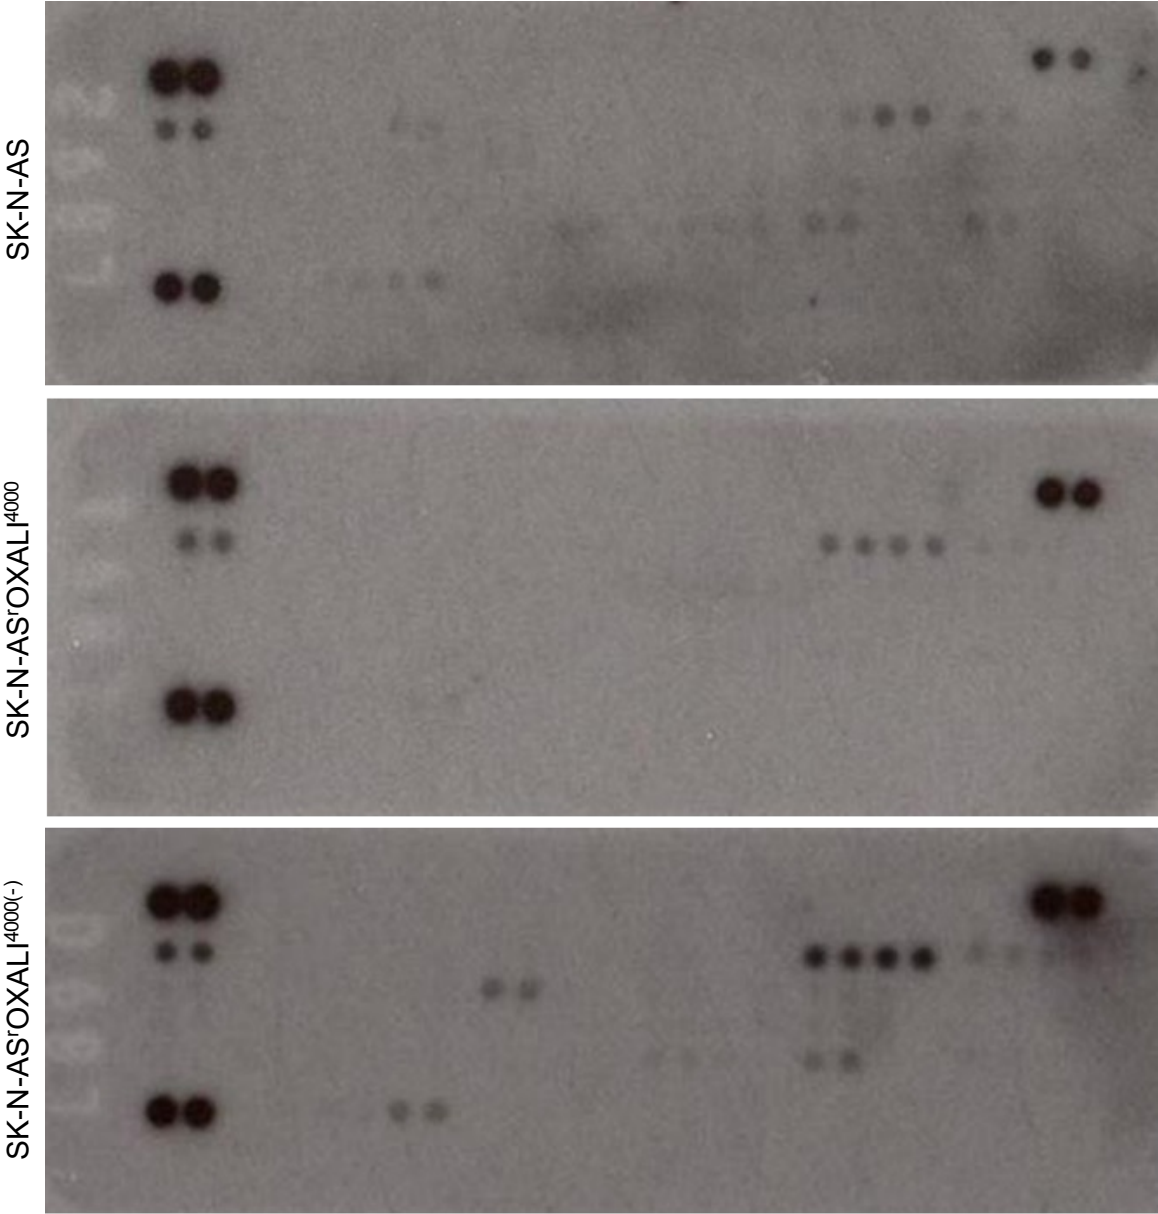

**B****Human Phospho-RTK Array Coordinates**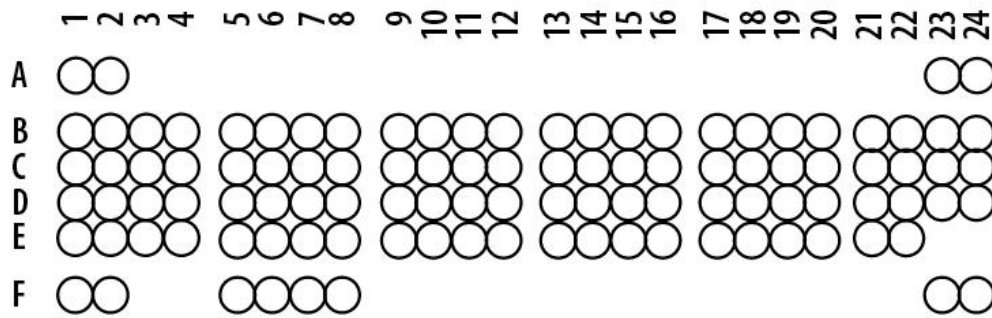

| Coordinate | Receptor Family | RTK/Control     | Coordinate | Receptor Family | RTK/Control |
|------------|-----------------|-----------------|------------|-----------------|-------------|
| A1, A2     | Reference Spots | —               | D1, D2     | Tie             | Tie-2       |
| A23, A24   | Reference Spots | —               | D3, D4     | NGF R           | TrkA        |
| B1, B2     | EGF R           | EGF R           | D5, D6     | NGF R           | TrkB        |
| B3, B4     | EGF R           | ErbB2           | D7, D8     | NGF R           | TrkC        |
| B5, B6     | EGF R           | ErbB3           | D9, D10    | VEGF R          | VEGF R1     |
| B7, B8     | EGF R           | ErbB4           | D11, D12   | VEGF R          | VEGF R2     |
| B9, B10    | FGF R           | FGF R1          | D13, D14   | VEGF R          | VEGF R3     |
| B11, B12   | FGF R           | FGF R2a         | D15, D16   | MuSK            | MuSK        |
| B13, B14   | FGF R           | FGF R3          | D17, D18   | Eph R           | EphA1       |
| B15, B16   | FGF R           | FGF R4          | D19, D20   | Eph R           | EphA2       |
| B17, B18   | Insulin R       | Insulin R       | D21, D22   | Eph R           | EphA3       |
| B19, B20   | Insulin R       | IGF-1 R         | D23, D24   | Eph R           | EphA4       |
| B21, B22   | Axl             | Axl             | E1, E2     | Eph R           | EphA6       |
| B23, B24   | Axl             | Dtk             | E3, E4     | Eph R           | EphA7       |
| C1, C2     | Axl             | Mer             | E5, E6     | Eph R           | EphB1       |
| C3, C4     | HGF R           | HGF R           | E7, E8     | Eph R           | EphB2       |
| C5, C6     | HGF R           | MSP R           | E9, E10    | Eph R           | EphB4       |
| C7, C8     | PDGF R          | PDGF R $\alpha$ | E11, E12   | Eph R           | EphB6       |
| C9, C10    | PDGF R          | PDGF R $\beta$  | E13, E14   | Insulin R       | ALK         |
| C11, C12   | PDGF R          | SCF R           | E15, E16   | —               | DDR1        |
| C13, C14   | PDGF R          | Flt-3           | E17, E18   | —               | DDR2        |
| C15, C16   | PDGF R          | M-CSF R         | E19, E20   | Eph R           | EphA5       |
| C17, C18   | RET             | c-Ret           | E21, E22   | Eph R           | EphA10      |
| C19, C20   | ROR             | ROR1            | F1, F2     | Reference Spots | —           |
| C21, C22   | ROR             | ROR2            | F5, F6     | Eph R           | EphB3       |
| C23, C24   | Tie             | Tie-1           | F7, F8     | —               | RYK         |
|            |                 |                 | F23, F24   | Control (-)     | PBS         |

**S1 Figure.** Kinome arrays of SK-N-AS, SK-N-AS<sup>rOXALI</sup><sup>4000</sup>, and SK-N-AS<sup>rOXALI</sup><sup>4000(-)</sup> cells. A) Autoradiographs, 1.7 mg/mL of protein were added to each of the kinome arrays; B) Organisation of the kinome array.
