# Supplementary material for: Acquired resistance to oxaliplatin is not directly associated with increased resistance to DNA damage in SK-N-ASrOXALI4000, a newly established oxaliplatin-resistant sub-line of the neuroblastoma cell line SK-N-AS
Source: PubMed Central journal article supplement (PMC5305101; doi:10.1371/journal.pone.0172140), 2017-02-13
Supplement: pone.0172140.s002.pdf [file pone.0172140.s002.pdf]

**S2 Figure**

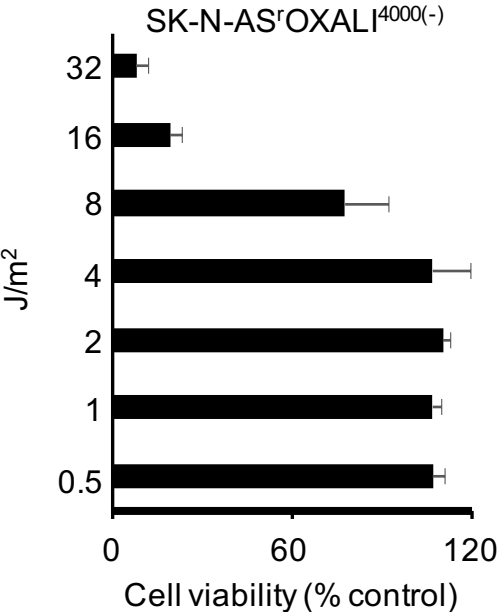

**S2 Figure.** Effects of ultraviolet C (UVC) radiation on the viability of SK-N-AS<sup>r</sup>OXALI<sup>4000(-)</sup> cells. Dose-dependent effects were detected by MTT assay five days post exposure.
