# Supplementary material for: Acquired resistance to oxaliplatin is not directly associated with increased resistance to DNA damage in SK-N-ASrOXALI4000, a newly established oxaliplatin-resistant sub-line of the neuroblastoma cell line SK-N-AS
Source: PubMed Central journal article supplement (PMC5305101; doi:10.1371/journal.pone.0172140), 2017-02-13
Supplement: pone.0172140.s003.pdf [file pone.0172140.s003.pdf]

**S1 Table.** Short tandem repeat (STR) profiles of SK-N-AS and SK-N-AS<sup>rOXALI</sup><sup>4000</sup>.

|                                           | <b>D5 S818</b> | <b>D13 S317</b> | <b>D7 S820</b>                                                                                 | <b>D16 S539</b> | <b>VWA</b>   | <b>TH 01</b>   | <b>Amel</b> | <b>TPOX</b>  | <b>CSF1 PO</b> |
|-------------------------------------------|----------------|-----------------|------------------------------------------------------------------------------------------------|-----------------|--------------|----------------|-------------|--------------|----------------|
| SK-N-AS (reference profile)               | <b>11/12</b>   | <b>9/9</b>      |  <b>11/13</b> | <b>14/14</b>    | <b>16/17</b> | <b>9,3/9,3</b> | <b>x/x</b>  | <b>11/12</b> | <b>10/12</b>   |
| SK-N-AS                                   | 11/12          | 9/9             |  11/13        | 14/14           | 16/17        | 9,3/9,3        | x/x         | 11/12        | 10/12          |
| SK-N-AS <sup>rOXALI</sup> <sup>4000</sup> | 11/12          | 9/9             |  11/13        | 14/14           | 16/17        | 9,3/9,3        | x/x         | 11/12        | 10/12          |
