# Supplementary material for: Acquired resistance to oxaliplatin is not directly associated with increased resistance to DNA damage in SK-N-ASrOXALI4000, a newly established oxaliplatin-resistant sub-line of the neuroblastoma cell line SK-N-AS
Source: PLOS journal article supplement (doi:10.1371/journal.pone.0172140), 2017-02-13
Supplement: S4 (10.1371/journal.pone.0172140.s004) [file journal.pone.0172140.s004.pdf]

**S2 Table.** Number of chromosomes observed in metaphases in SK-N-AS, SK-N-AS<sup>rOXALI</sup><sup>4000(-)</sup>, or SK-N-AS<sup>rOXALI</sup><sup>4000</sup> cells; N°, number; n = 23.

| Level of ploidy<br>(number of<br>chromosomes) | SK-N-AS      | SK-N-<br>AS <sup>rOXALI</sup> <sup>4000(-)</sup> | SK-N-<br>AS <sup>rOXALI</sup> <sup>4000</sup> |
|-----------------------------------------------|--------------|--------------------------------------------------|-----------------------------------------------|
|                                               | N° metaphase | N° metaphase                                     | N° metaphase                                  |
| Haploidy (#23-45)                             | 66           | 9                                                | 12                                            |
| Diploidy (#46-68)                             | 188          | 157                                              | 134                                           |
| Triploidy (#69-91)                            | 96           | 167                                              | 205                                           |
| Tetraploidy (#92-114)                         | 13           | 57                                               | 32                                            |
| Pentaploidy<br>(#115-137)                     | 7            | 15                                               | 14                                            |
| Hexaploidy (#138-160)                         | 3            | 8                                                | 2                                             |
| Heptaploidy<br>(#161-183)                     | 0            | 0                                                | 1                                             |
| <b>Total</b>                                  | <b>373</b>   | <b>414</b>                                       | <b>400</b>                                    |
