# Supplementary material for: Acquired resistance to oxaliplatin is not directly associated with increased resistance to DNA damage in SK-N-ASrOXALI4000, a newly established oxaliplatin-resistant sub-line of the neuroblastoma cell line SK-N-AS
Source: PLOS journal article supplement (doi:10.1371/journal.pone.0172140), 2017-02-13
Supplement: S5 (10.1371/journal.pone.0172140.s005) [file journal.pone.0172140.s005.pdf]

**S3 Table.** Number of fully and partially labelled chromosomes observed in the cell line SK-N-AS, its oxaliplatin-resistant sub-line SK-N-AS<sup>rOXALI</sup><sup>4000</sup>, SK-N-AS<sup>rOXALI</sup><sup>4000(-)</sup> cells that had been cultivated for ≥ 10 weeks in the absence of oxaliplatin (SK-N-AS<sup>rOXALI</sup><sup>4000(-)</sup>) line metaphases (N°, number; n= 23).

| Chromosome | SK-N-AS                                                                  |                    | SK-N-AS <sup>rOXALI</sup> <sup>4000(-)</sup>                                              |                    | SK-N-AS <sup>rOXALI</sup> <sup>4000</sup>                                                 |                    |
|------------|--------------------------------------------------------------------------|--------------------|-------------------------------------------------------------------------------------------|--------------------|-------------------------------------------------------------------------------------------|--------------------|
|            | N° metaphases (number of images signal observed/number of images viewed) |                    | N° metaphases with chromosomes (number of images signal observed/number of images viewed) |                    | N° metaphases with chromosomes (number of images signal observed/number of images viewed) |                    |
|            | Fully labelled                                                           | Partially labelled | Fully labelled                                                                            | Partially labelled | Fully labelled                                                                            | Partially labelled |
| 1          | 85 (16/16)                                                               | 33 (15/16)         | 103 (19/19)                                                                               | 47 (19/19)         | 64 (17/17)                                                                                | 44 (17/17)         |
| 2          | 40 (9/9)                                                                 | 2 (1/9)            | 62 (17/18)                                                                                | 12 (5/18)          | 64 (16/16)                                                                                | 16 (8/16)          |
| 3          | 21 (11/13)                                                               | 17 (11/13)         | 45 (16/17)                                                                                | 31 (13/17)         | 34 (15/16)                                                                                | 41 (16/16)         |
| 4          | 73 (18/18)                                                               | 46 (18/18)         | 49 (16/16)                                                                                | 24 (15/16)         | 57 (16/16)                                                                                | 27 (13/16)         |
| 5          | 62 (16/16)                                                               | 26 (15/16)         | 95 (19/19)                                                                                | 31 (15/19)         | 77 (18/18)                                                                                | 25 (13/18)         |
| 6          | 53 (17/17)                                                               | 29 (13/17)         | 59 (15/15)                                                                                | 32 (13/15)         | 62 (19/19)                                                                                | 47 (18/19)         |
| 7          | 60 (16/16)                                                               | 23 (13/16)         | 56 (18/18)                                                                                | 75 (18/18)         | 52 (18/18)                                                                                | 66 (17/18)         |
| 8          | 77 (17/17)                                                               | 38 (12/17)         | 76 (16/16)                                                                                | 37 (12/16)         | 102 (18/18)                                                                               | 64 (18/18)         |

|    |            |            |             |            |             |            |
|----|------------|------------|-------------|------------|-------------|------------|
| 9  | 59 (15/15) | 8 (3/15)   | 76 (15/15)  | 8 (4/15)   | 61 (14/14)  | 11 (6/14)  |
| 10 | 56 (18/18) | 2 (1/18)   | 54 (18/18)  | 71 (18/18) | 42 (15/15)  | 58 (15/15) |
| 11 | 38 (16/16) | 17 (10/16) | 38 (18/18)  | 30 (16/18) | 33 (18/18)  | 30 (16/18) |
| 12 | 69 (18/18) | 9 (6/18)   | 106 (17/17) | 31 (13/17) | 66 (16/16)  | 42 (15/16) |
| 13 | 40 (16/16) | 20 (9/16)  | 59 (16/17)  | 68 (17/17) | 54 (17/18)  | 34 (13/18) |
| 14 | 31 (12/16) | 26 (12/16) | 44 (16/19)  | 47 (15/19) | 59 (15/16)  | 26 (9/16)  |
| 15 | 58 (17/17) | 8 (5/17)   | 86 (16/16)  | 42 (16/16) | 86 (16/16)  | 18 (7/16)  |
| 16 | 60 (15/15) | 0 (0/15)   | 117 (22/22) | 1 (1/22)   | 108 (19/19) | 0 (0/19)   |
| 17 | 56 (14/14) | 26 (9/14)  | 75 (18/18)  | 46 (16/18) | 58 (15/15)  | 39 (15/15) |
| 18 | 43 (16/16) | 21 (10/16) | 56 (19/19)  | 72 (19/19) | 44 (17/17)  | 43 (17/17) |
| 19 | 42 (23/23) | 0 (23/0)   | 66 (20/20)  | 0 (0/20)   | 82 (19/19)  | 16 (9/19)  |
| 20 | 48 (21/21) | 1 (1/21)   | 90 (21/21)  | 1 (21/21)  | 72 (19/19)  | 0 (0/19)   |
| 21 | 51 (15/15) | 8 (4/15)   | 54 (16/16)  | 33 (13/16) | 96 (17/18)  | 64 (15/18) |
| 22 | 25 (10/10) | 11 (7/10)  | 59 (17/17)  | 48 (15/17) | 65 (17/17)  | 45 (15/17) |
| X  | 31 (18/18) | 22 (14/18) | 35 (19/19)  | 37 (19/19) | 37 (19/19)  | 36 (18/19) |
