# Supplementary material for: Acquired resistance to oxaliplatin is not directly associated with increased resistance to DNA damage in SK-N-ASrOXALI4000, a newly established oxaliplatin-resistant sub-line of the neuroblastoma cell line SK-N-AS
Source: PLOS journal article supplement (doi:10.1371/journal.pone.0172140), 2017-02-13
Supplement: S6 (10.1371/journal.pone.0172140.s006) [file journal.pone.0172140.s006.pdf]

**S4 Table.** Neuroblastoma cell drug sensitivity as indicated by drug concentrations that reduce cell viability by 50 % (IC<sub>50</sub>) or 90 % (IC<sub>90</sub>) determined after 120 h of incubation by MTT assay.

| drug                   | SK-N-AS          |                  | SK-N-AS <sup>r</sup> OXALI <sup>4000</sup> |                      | SK-N-AS <sup>r</sup> OXALI <sup>4000(-)</sup> |                      |
|------------------------|------------------|------------------|--------------------------------------------|----------------------|-----------------------------------------------|----------------------|
|                        | IC <sub>50</sub> | IC <sub>90</sub> | IC <sub>50</sub>                           | IC <sub>90</sub>     | IC <sub>50</sub>                              | IC <sub>90</sub>     |
| oxaliplatin<br>(µg/mL) | 0.0092 ± 0.0030  | 0.048 ± 0.004    | 7.68 ± 1.81<br>(835) <sup>1</sup>          | 37.1 ± 13.2<br>(774) | 4.48 ± 1.58<br>(487)                          | 24.4 ± 7.9<br>(509)  |
| cisplatin<br>(µg/mL)   | 0.030 ± 0.007    | 0.193 ± 0.070    | 1.00 ± 0.09<br>(33)                        | 2.25 ± 0.29<br>(12)  | 1.37 ± 1.01<br>(46)                           | 2.57 ± 0.90<br>(13)  |
| carboplatin<br>(µg/mL) | 0.121 ± 0.020    | 1.24 ± 0.75      | 7.02 ± 0.69<br>(58)                        | 14.7 ± 1.4<br>(12)   | 10.3 ± 5.7<br>(85)                            | 20.0 ± 10.8<br>(16)  |
| doxorubicin<br>(ng/mL) | 18.6 ± 3.9       | 37.7 ± 15.3      | 7.81 ± 0.54<br>(0.4)                       | 19.1 ± 4.1<br>(0.5)  | 6.9 ± 0.4<br>(0.4)                            | 16.1 ± 5.5<br>(0.4)  |
| gemcitabine<br>(ng/mL) | 1.36 ± 0.44      | 2.60 ± 0.57      | 0.62 ± 0.16<br>(0.5)                       | 0.97 ± 0.34<br>(0.4) | 1.27 ± 0.08<br>(0.9)                          | 1.82 ± 0.33<br>(0.7) |

<sup>1</sup> fold change relative to SK-N-AS
